# Supplementary material for: Effects of Long-Term Use of Organic Fertilizer with Different Dosages on Soil Improvement, Nitrogen Transformation, Tea Yield and Quality in Acidified Tea Plantations
Source: MDPI journal article supplement (doi:10.3390/plants12010122), 2022-12-26
Supplement: s1 [file s1]

## Supplementary Materials

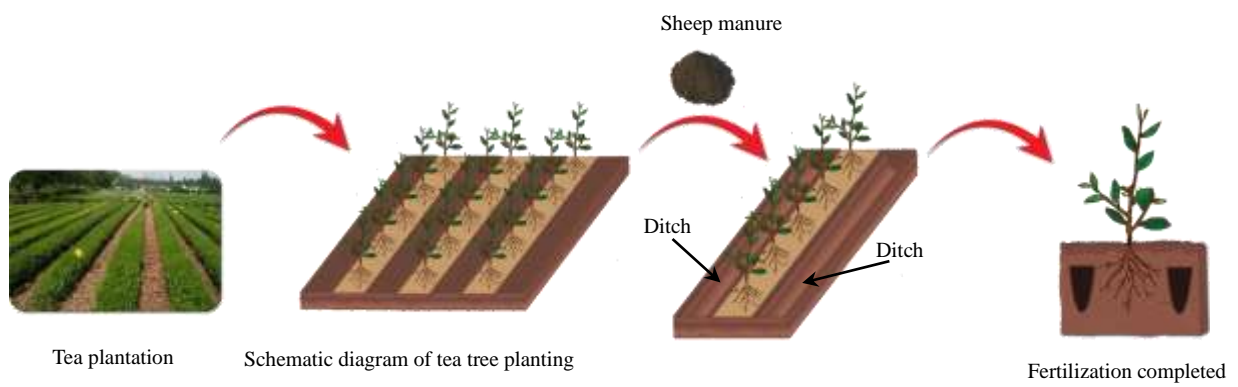

**Figure S1 Schematic diagram of how to use sheep manure**

**Table S1 The tea tree and soil index values of the tea plantation in the experimental site were determined in May 2017**

|                                                  | Sample number | Numerical range | Average | Standard deviation | Coefficient of variation (%) |
|--------------------------------------------------|---------------|-----------------|---------|--------------------|------------------------------|
| pH value                                         | 175           | 3.34~3.41       | 3.38    | 0.06               | 1.78                         |
| Yield (kg/hm <sup>2</sup> )                      | 175           | 3045~3136       | 3104    | 105                | 3.38                         |
| Tea polyphenols (mg/g)                           | 175           | 148.35~154.26   | 153.24  | 3.98               | 2.60                         |
| Theanine (mg/g)                                  | 175           | 5.18~5.41       | 5.32    | 0.19               | 3.57                         |
| Amino acid (mg/g)                                | 175           | 14.32~15.31     | 14.98   | 0.37               | 2.47                         |
| Caffeine (mg/g)                                  | 175           | 13.25~14.31     | 13.86   | 0.41               | 2.96                         |
| Nitrate nitrogen (mg/kg)                         | 175           | 63.94~66.08     | 65.32   | 1.29               | 1.97                         |
| Ammonium nitrogen (mg/kg)                        | 175           | 0.65~1.38       | 1.03    | 0.24               | 23.30                        |
| Nitrifying bacteria(10 <sup>5</sup> cfu/g-soil)  | 175           | 18.87~21.45     | 20.36   | 0.29               | 1.42                         |
| Ammonifying bacteria(10 <sup>7</sup> cfu/g-soil) | 175           | 7.98~8.52       | 8.37    | 0.18               | 2.15                         |
| Nitrification intensity (%)                      | 175           | 33.53~35.06     | 34.15   | 0.42               | 1.23                         |
| Ammoniation strength (mg/100 mL)                 | 175           | 16.89~19.43     | 18.79   | 1.08               | 5.75                         |
| Urease (μmol/min·L)                              | 175           | 138.74~144.23   | 141.28  | 2.62               | 1.85                         |
| Protease (μmol/min·L)                            | 175           | 7.85~9.03       | 8.57    | 0.57               | 6.65                         |
| Nitrate reductase (μmol/min·L)                   | 175           | 6.81~7.34       | 7.13    | 0.26               | 3.65                         |
| Nitrite reductase (μmol/min·L)                   | 175           | 168.52~175.91   | 173.25  | 3.89               | 2.25                         |
